# Supplementary material
Source: publisher site journal article supplement (https://static.cambridge.org/content/id/urn:cambridge.org:id:article:S0899823X20013197/resource/name/S0899823X20013197supp001.pdf)
Supplement: Supplementary file 1 [file S0899823X20013197supp001.pdf]

## Questionnaire 'Neonatology HCP screening for MRSA'

Q1. I work on neonatology as a...

- nurse
- physician
- other profession

Q2. My age is...

- < 30 years
- 30 – 39 years
- 40 – 49 years
- ≥ 50 years

Q3. My working experience on neonatology is

- < 1 year
- 1 – 4 years
- 5 – 9 years
- ≥ 10 years

Q4. Did you participate in the HCP MRSA screening on neonatology?

- Yes
- No

**If Q4 is answered with 'yes' proceed to Q5, if Q4 is answered with 'no' proceed to Q6.**

Q5. Which of the following influenced your decision to participate in the MRSA screening? (multiple choice question)

- I wanted to preclude transmission of MRSA from me to patients
- I was worried about my own health or the health of my family
- I just followed the invitation to participate
- Other reasons, such as... (free text answer)

**Please proceed to Q8.**

Q6. Which of the following influenced your decision NOT to participate in MRSA screening? (multiple choice question)

- I did not work during screening hours
- I perceived screening as violation of my privacy
- I was afraid of the result
- I felt to be inadequately informed about screening and/or consequences of screening result
- I perceived screening to be senseless
- Other reasons, such as... (free text answer)

Q7. Would you have participated under the following circumstances?:

- If screening did take place outside of neonatology ward

- If more information about screening and/or consequences of screening result would have been provided
- If screening was mandatory
- If concerns about adequate pseudonymization were dissolved
- Other reasons, such as... (free text answer)

Q8-Q11. I felt motivated to participate in the HCP MRSA screening by...

Q8. Colleagues

agree      do not agree

Q9. Clinic management of neonatology

agree      do not agree

Q10. Infection prevention and control team

agree      do not agree

Q11. University hospital medical officer

agree      do not agree

Q12-Q15. I felt stressed to participate in the HCP MRSA screening by...

Q12. Colleagues

agree      do not agree

Q13. Clinic management of neonatology

agree      do not agree

Q14. Infection prevention and control team

agree      do not agree

Q15. University hospital medical officer

agree      do not agree

Q16. The pseudonymization process was sufficiently guaranteed

- Yes

- No  
If 'no' please explain: ... (free text answer)

Q17. I would have had agreed with a mandatory HCP MRSA screening

- Yes.  
- Please justify you answer: ... (free text answer)
- No.  
- Please justify you answer: ... (free text answer)

Q18. For possible future screenings of personnel, blinding of the results is necessary towards:

- Colleagues
- Clinic management of neonatology
- Infection prevention and control team
- University hospital medical officer
